# Supplementary material
Source: publisher site journal article supplement (https://www.spandidos-publications.com/7538/downloadSupplementary)
Supplement: Supplementary file 1 [file downloadSupplementary]

Table SI. Univariate analysis of disease-free survival.

| Characteristic                    | No. of patients | Univariate analysis |                     |
|-----------------------------------|-----------------|---------------------|---------------------|
|                                   |                 | 3-year DFS (%)      | P-value             |
| Age, years                        |                 |                     | 0.709               |
| <75                               | 35              | 71.4                |                     |
| ≥75                               | 11              | 72.7                |                     |
| Sex                               |                 |                     | 0.657               |
| Female                            | 23              | 69.6                |                     |
| Male                              | 23              | 69.6                |                     |
| BMI, kg/m <sup>2</sup>            |                 |                     | 0.471               |
| >18.5                             | 40              | 70.0                |                     |
| ≤18.5                             | 6               | 66.7                |                     |
| CEA, ng/ml                        |                 |                     | 0.916               |
| <5                                | 37              | 70.3                |                     |
| ≥5                                | 9               | 66.7                |                     |
| CA19-9, units/ml                  |                 |                     | 0.523               |
| <37                               | 37              | 67.6                |                     |
| ≥37                               | 9               | 77.8                |                     |
| Tumor location                    |                 |                     | 0.109               |
| Colon or rectosigmoid colon       | 31              | 74.2                |                     |
| Rectum                            | 15              | 60.0                |                     |
| Histological differentiation      |                 |                     | <0.001 <sup>b</sup> |
| Well-moderate                     | 43              | 76.2                |                     |
| Poor or mucinous                  | 3               | 0                   |                     |
| Pathological T stage <sup>a</sup> |                 |                     | 0.030 <sup>b</sup>  |
| T1-2                              | 18              | 77.8                |                     |
| T3-4                              | 28              | 64.3                |                     |
| Pathological N stage <sup>a</sup> |                 |                     | <0.001 <sup>b</sup> |
| N0                                | 28              | 85.7                |                     |
| N1-2                              | 18              | 44.4                |                     |
| Pathological stage <sup>a</sup>   |                 |                     | 0.011 <sup>b</sup>  |
| 0-I                               | 16              | 81.3                |                     |
| II-III                            | 30              | 63.3                |                     |
| Lymphovascular invasion           |                 |                     | 0.034 <sup>b</sup>  |
| Absent                            | 13              | 76.9                |                     |
| Present                           | 33              | 66.7                |                     |

DFS, disease-free survival; BMI, body mass index; CEA, carcinoembryonic antigen; CA, carbohydrate antigen.

<sup>a</sup>The 8th edition of the Union for International Cancer Control-Tumor Node Metastasis classification. <sup>b</sup>Statistically significant. Log-rank test was used for group comparisons

Table SII. Firth-penalized Cox regression analysis.

| Variable                          | HR        | 95% CI        | P-value             |
|-----------------------------------|-----------|---------------|---------------------|
| Membranous SDC1                   |           |               |                     |
| Q1-2                              | Reference |               |                     |
| Q3-4                              | 0.209     | 0.03-0.87     | 0.031 <sup>b</sup>  |
| Histological differentiation      |           |               |                     |
| Well-moderate                     | Reference |               |                     |
| Poor or mucinous                  | 128.657   | 8.15-20409.98 | <0.001 <sup>b</sup> |
| Pathological T stage <sup>a</sup> |           |               |                     |
| T1-2                              | Reference |               |                     |
| T3-4                              | 0.364     | 0.05-4.02     | NA                  |
| Pathological N stage <sup>a</sup> |           |               |                     |
| N0                                | Reference |               |                     |
| N1-2                              | 7.379     | 1.39-78.50    | 0.017 <sup>b</sup>  |
| Pathological stage <sup>a</sup>   |           |               |                     |
| 0-I                               | Reference |               |                     |
| II-III                            | 1.869     | 0.04-3793.89  | NA                  |
| Lymphovascular invasion           |           |               |                     |
| Absent                            | Reference |               |                     |
| Present                           | 1.634     | 0.01-411.66   | 0.901               |

HR, hazard ratio; CI, confidence interval; SDC1, syndecan-1; Q, quartile, NA, not available. <sup>a</sup>The 8th edition of the Union for International Cancer Control-Tumor Node Metastasis classification. <sup>b</sup>Statistically significant.
